# Supplementary material for: Genome-wide detection of segmental duplications and potential assembly errors in the human genome sequence
Source: Springer Nature journal article supplement (doi:10.1186/gb-2003-4-4-r25), 2003-04-01
Supplement: Additional file 1 [file gb-2003-4-4-r25-s1.doc]

**Additional Table 1**

Relative frequency increase of repeat types at duplicon junction

| Repeat Type | # found in dup junction | # in human genome | Enrichmenta | p-value |
| --- | --- | --- | --- | --- |
| srpRNA | 24 | 2672 | 8.87 | < 10-7 |
| Satellite | 155 | 17623 | 8.69 | < 10-7 |
| LTR/ERVK | 169 | 49704 | 3.36 | < 10-7 |
| Other | 70 | 21328 | 3.24 | < 10-7 |
| Satellite/centr | 58 | 26883 | 2.13 | < 10-7 |
| snRNA | 19 | 9593 | 1.96 | < 0.003 |
| LTR/ERV1 | 961 | 563090 | 1.69 | < 10-7 |
| DNA/MER1 | 20 | 11948 | 1.65 | < 0.02 |
| SINE/Alu | 4730 | 2842814 | 1.64 | < 10-7 |
| Simple_repeat | 1315 | 790802 | 1.64 | < 10-7 |
| Low_complexity | 1072 | 728896 | 1.45 | < 10-7 |
| LINE/L1 | 3892 | 3055401 | 1.26 | < 10-7 |

aEnrichment is equivalent to odds ratio obtained from chi-square test

**Additional Table 2**

**Number of ambiguousgly mapped SNPs within segmental duplications (number of PSVs).**

| chromosome | All refSNP | ambSNPs | ambSNPs in duplication  (PSVs) |
| --- | --- | --- | --- |
| 1 | 215000 | 21208 | 14864 |
| 2 | 170524 | 17756 | 14784 |
| 3 | 140624 | 6210 | 2287 |
| 4 | 127129 | 5934 | 3459 |
| 5 | 163530 | 9782 | 6019 |
| 6 | 142882 | 8584 | 5359 |
| 7 | 138775 | 19634 | 17378 |
| 8 | 108790 | 6118 | 2938 |
| 9 | 104106 | 20268 | 16745 |
| 10 | 113119 | 8102 | 6402 |
| 11 | 126819 | 7148 | 3278 |
| 12 | 98332 | 6688 | 2138 |
| 13 | 78911 | 2320 | 1567 |
| 14 | 70803 | 1668 | 1025 |
| 15 | 68163 | 9108 | 7156 |
| 16 | 75552 | 14666 | 11291 |
| 17 | 64827 | 13148 | 9998 |
| 18 | 66352 | 2810 | 1077 |
| 19 | 51468 | 4851 | 2925 |
| 20 | 52110 | 1224 | 854 |
| 21 | 51542 | 1166 | 773 |
| 22 | 41466 | 4736 | 3681 |
| X | 51718 | 4362 | 1971 |
| Y | 4931 | 2474 | 2005 |
| Total | 2327473 | 199965 | 139974 |

**Additional Figure 1**

**Functional profiling of genes involved in recent whole-gene duplication vs human genome average*.**

*Numerical statistics can be obtained from http://chr7.ocgc.ca/humandup
